1  
2  
3  
4  
5  
6  
7  
8  
9  
10  
11  
12  
13  
14  
15  
16  
17  
18  
19  
20  
21  
22  
23  
24  
25  
26  
27  
28  
29  
30  
31  
32  
33

# Automated remote focusing, drift correction, and photostimulation to evaluate structural plasticity in dendritic spines

Michael S Smirnov<sup>1\*</sup>, Paul R Evans<sup>2</sup>, Tavita R Garrett<sup>1</sup>, Long Yan<sup>3</sup>, Ryohei Yasuda<sup>1</sup>

<sup>1</sup>Neuronal Signal Transduction, Max Planck Florida Institute for Neuroscience, Jupiter, Florida, United States of America

<sup>2</sup>Department of Pharmacology, Emory University School of Medicine, Atlanta, Georgia, United States of America

<sup>3</sup>Light Microscopy Core, Max Planck Florida Institute for Neuroscience, Jupiter, Florida, United States of America

\* Corresponding Author  
E-mail: Michael.Smirnov@mpfi.org

## 34 Abstract

35 Long-term structural plasticity of dendritic spines plays a key role in synaptic plasticity, the cellular basis  
 36 for learning and memory. The biochemical step is mediated by a complex network of signaling proteins  
 37 in spines. Two-photon imaging techniques combined with two-photon glutamate uncaging allows  
 38 researchers to induce and quantify structural plasticity in single dendritic spines. However, this method  
 39 is laborious and slow, making it unsuitable for high throughput screening of factors necessary for  
 40 structural plasticity. Here we introduce a MATLAB-based module built for Scanimage to automatically  
 41 track, image, and stimulate multiple dendritic spines. We implemented an electrically tunable lens in  
 42 combination with a drift correction algorithm to rapidly and continuously track targeted spines and  
 43 correct sample movements. With a straightforward user interface to design custom multi-position  
 44 experiments, we were able to adequately image and produce targeted plasticity in multiple dendritic  
 45 spines using glutamate uncaging. Our methods are inexpensive, open source, and provides up to a  
 46 five-fold increase in throughput for quantifying structural plasticity of dendritic spines.

47

## 48 Introduction

49 Structural changes in dendritic spines, tiny postsynaptic protrusions on the dendritic surface of neurons,  
 50 are considered to be the basis of synaptic plasticity, learning, and memory [1-5]. Among several forms  
 51 of spine structural plasticity, structural long-term potentiation (sLTP) of single dendritic spines has been  
 52 extensively examined as a structural correlate of functional LTP (fLTP), an electrophysiological model  
 53 of learning and memory [3, 5, 6]. Applying two-photon glutamate uncaging at a single dendritic spine  
 54 induces a rapid and long lasting spine enlargement at the stimulated spine, but not the surrounding  
 55 spines [3]. The signaling cascades necessary for sLTP have been studied by combining sLTP imaging  
 56 with pharmacological and genetic manipulation. Both sLTP and fLTP depend on NMDA-type glutamate

57 receptors (NDMAR), Ca<sup>2+</sup>/Calmodulin-dependent kinase II (CaMKII) and several small GTPase  
58 proteins including Ras, Cdc42, Rac1 and RhoA [4, 7-11]. However, due to the low-throughput nature of  
59 the measurement, the study of sLTP has been limited to only a few proteins, and among more than  
60 1000 proteins expressed in spines [12-14], it is largely unknown which ones are necessary for spine  
61 structural plasticity.

62 The quantification of long-term structural plasticity of dendritic spines requires imaging single spines  
63 over extended periods of time (typically ~1 h), and it is necessary to continuously refocus to the target  
64 spines. Moreover, in general, imaging and stimulating multiple dendrites over long periods of time has  
65 been difficult with regular two-photon microscopy, limiting the throughput of the quantification of spine  
66 structural plasticity. Thus, it was necessary to develop a system that allows for 1) automatic focus and  
67 drift correction for long-term tracking of dendritic spines and 2) imaging and stimulation of several  
68 regions of interests (ROIs).

69 Although automated focusing for microscopy is a well-studied topic in literature [15-22], most algorithms  
70 are designed for highly specific imaging modes and preparations. These techniques have been tested  
71 under well-defined parameters, therefore, their application in a novel paradigm often results in an  
72 overwhelming amount of trial-and-error. Algorithms tend to be uniquely suited to either bright-field,  
73 phase, or fluorescence microscopy [23]. A lack of functional specificity for software focusing has led  
74 some groups to development more inclusive algorithms [20], but the wide variety of imaging setups and  
75 biological preparations leaves these attempts incomplete. Hardware focusing systems that correct  
76 focus by tracking coverslip location are also commercially available [24], but are incapable of correcting  
77 focus drift due to sample deformation which occurs in soft neuronal tissue such as brain slices. In order  
78 to optimize software focusing for dendritic spine imaging, an automated algorithm selection tool is  
79 necessary to best adapt to the optical parameters and tissue characteristics in the experiment. In  
80 addition, since live neuronal tissue can be highly sensitive to objective movements, it is necessary to  
81 use a focusing system without objective movements, e.g. an electro-tunable lens (ETL) [25-27].

Based on the open-source MATLAB imaging suite Scanimage [28] and an ETL, we have developed an automated system to stimulate and image several individual spines over extended periods of time. With the implementation of an ETL and custom tracking software, our system avoids any artifacts caused by objective or stage movement. We demonstrate that this system allows us to rapidly quantify sLTP in large number of spines.

## Results

In order to achieve rapid and reliable focusing required for auto-focusing system, we employed ETL to our two-photon microscope by placing it at a conjugate plane of the back-focal plane of the objective (Fig 1A). A pre-ETL lens resizes the beam to fit the full aperture of the ETL, while two more lenses serve to resize the beam to fit the galvanometers. In this setup, regardless of ETL shape, the beam size is constant at the galvanometers and the back aperture plane of the objective. This setup minimizes the loss of beam intensity and spherical aberration.

**Fig 1. ETL installed in the excitation path and controlled via software GUIs.** (A) An ETL in the excitation pathway shapes the incoming beam for remote focusing. Beam shape (red/green) is controlled by curvature of the ETL. L2 and L3 lenses are placed to conjugate the ETL to the back aperture of the objective lens. (B) A GUI controls ETL shape. Voltage values are translated to Z position, and the relative shift of the imaging plane is previewed in a 3D graphic. Z values corresponding to voltages are set either by a linear constant or polynomial curve. (C) ETL voltages are correlated to linear stage movements using an automated alignment routine. (D) Tilted imaging is previewed by adjusting voltage range, as the ETL voltage is altered in phase with the slow-scanning galvanometer.

We controlled the focal length of ETL by changing current passing through the lens using a custom interface built into Scanimage using Matlab (Fig 1B). Initial tuning of the ETL is accomplished by stepwise movement of a Z motor combined with an autofocusing step using solely the ETL. The resulting voltages used to control the ETL are automatically associated with Z displacement values, while a conversion function is set using either a linear constant or polynomial fitted curve (Fig 1 B,C). A

107 3D preview of the imaging plane shows the relative position of the Z plane as a result of ETL offset.  
 108 Finally, by varying the ETL current in phase with the galvanometer scanning cycle, we were able to tilt  
 109 the imaging plane, thus allowing users to capture objects which would otherwise require multiple Z  
 110 slices [27] (Fig 1D).

111 In order to make long-term imaging possible, we added an interface to compensate for both axial and  
 112 lateral drift (Fig 2B). Before the start of imaging, users define the range, step size, and frequency  
 113 parameters for an autofocus routine. When Z-stacks are collected, images are automatically used for  
 114 auto-focusing. A region of interest (ROI) is defined around the dendritic spine to be stimulated. In order  
 115 to expand the applicability of our autofocus module to various imaging setups, we have included 30  
 116 different autofocusing algorithms, previously described by Pertuz et al. [29]. To test the appropriate  
 117 algorithm for our purpose, we designed an additional application which tests each algorithm against a  
 118 set of pre-acquired Z stack images, comparing both accuracy and computation time (Fig 2A). In order  
 119 to ensure that the autofocus algorithm is running normally and using the appropriate part of an image,  
 120 each collected slice is displayed along with its respective ROI and Z position (Fig 2D). Finally, lateral  
 121 drift is measured by comparing the imaged position with a reference image by calculating cross-  
 122 correlation (8), and corrected by immediately shifting the galvanometer scanning angle. While both  
 123 autofocus and lateral drift correction speeds are dependent on the pixel count of an image, the speed of  
 124 calculation for a 128x128 pixel image is consistently less than 10 ms (Fig 2D), far exceeding the speed  
 125 required for most imaging setups.

126 **Fig 2. Custom autofocus and drift correction parameters track spines over time.** (A) Sample result of the autofocus  
 127 algorithm selection tool based on 30 Z stacks with 6 slices each. All algorithms adapted from Pertuz, et al. [29]. Abbreviations  
 128 expanded in Table 1. Percent relative accuracy (gray bars) indicates standardized mean distance of Z position selected by  
 129 algorithm vs target. 100% = no distance, 0% = maximum distance, 50% = distance if position is picked at random. Blue lines  
 130 indicate average time to calculate focus value for each slice. (B) Focus and drift correction is controlled through a GUI. Users  
 131 identify an algorithm, Z range and amount of steps, and whether extra images are collected for autofocus. Drift correction can  
 132 be enabled to use galvanometers (scan shift) or motor repositioning. Users also have the option to enable or disable the ETL.

133 (D) Reference-based drift correction speed is correlated with pixel size. Image resolution indicates pixel count for one  
134 dimension of a square image. (C) Live updates inform users of the selected focus position (green box) and spine ROI used to  
135 determine relative focus value (red box).

136 **Table 1. Abbreviations for autofocus operators**

|      |                                     |
|------|-------------------------------------|
| ACMO | Absolute central moment [30]        |
| BREN | Brenner's focus measure [21]        |
| CONT | Image contrast [31]                 |
| CURV | Image curvature [32]                |
| DCTE | DCT Energy measure [18]             |
| DCTR | DCT Energy ratio [33]               |
| GDER | Gaussian derivative [20]            |
| GLVA | Gray-level variance [34]            |
| GLLV | Gray-level local variance [35]      |
| GLVN | Gray-level variance normalized [21] |
| GRAE | Energy of gradient [36]             |
| GRAT | Thresholded gradient [21]           |
| GRAS | Squared gradient [37]               |
| HELM | Helmi's measure [32]                |
| HISE | Histogram entropy [34]              |
| HISR | Histogram range [22]                |
| LAPE | Energy of Laplacian [36]            |
| LAPM | Modified Laplacian [38]             |
| LAPV | Variance of Laplacian [35]          |
| LAPD | Diagonal Laplacian [39]             |
| SFIL | Steerable filters-based [40]        |
| SFRQ | Spatial frequency [37]              |
| TENG | Tenengrad [34]                      |
| TENV | Tenengrad variance [35]             |
| VOLA | Vollat's correlation-based [21]     |
| BRGT | Maximum Brightness                  |
| MGRD | Maximum Brightness Gradient         |

137

138 In addition, we designed a user-friendly interface to rapidly find, store, image, and stimulate multiple  
139 positions (Fig 3). Either motor or scanning controls are used to identify dendritic spines for  
140 photostimulation (glutamate uncaging). As positions are defined, reference images are automatically  
141 collected (Fig 3D). Once all positions are defined, all motor positions are mapped to galvanometer

142 scanning angles (Fig 3A). A separate window allows users to design a timeline for their experiment (Fig  
143 3B). The timeline allows users to control imaging frequency, duration, and define when glutamate  
144 uncaging will occur to stimulate dendritic spines. Timeline events can be staggered between positions  
145 to avoid conflict between successive uncaging or exclusive imaging events. If the amount of defined  
146 positions exceeds the maximum which could be concurrently imaged within a given time constraint, new  
147 positions are rotated into the imaging sessions as imaging for other positions is completed (Fig 3B). As  
148 imaging proceeds, each position is continuously updated using its reference image (Fig 3D), while an  
149 automatic re-alignment of the photoactivation ROI to the cell membrane immediately precedes  
150 photoactivation (Fig 3E).

151 **Fig 3. Non-motorized, automated, multi-position ROI selection, imaging, and photoactivation is controlled through a**  
152 **user-friendly interface.** (A) GUI showing all motor positions that are translated to galvanometer scanning coordinates within a  
153 single field of view (FOV, large square). (B) A custom timeline interface allows users to design and preview imaging and (blue,  
154 green) and uncaging (red) cycles at each position. (C) A master GUI to keep track of and move between all imaging positions.  
155 Settings and coordinates can be saved and loaded. Z depth is set for each position to automatically modulate uncaging laser  
156 power to amounts of tissue interference in brain slices. Experimental Notes are automatically saved with each imaging cycle  
157 and can be altered to reflect experimental parameters. (D) GUI showing reference images for each position. Reference images  
158 are used for drift correction. Zoomed out reference images (right) are used for initial alignment. Threshold intensity values are  
159 set so each uncaging ROI (E, red) is shifted appropriately relative to the cell dendrite perimeter (E, blue).

160 To test and further optimize the efficacy of our non-motor multi-position imaging system, we measured  
161 structural plasticity of dendritic spines in hippocampal CA1 neurons transfected with enhanced green  
162 fluorescent protein (EGFP) in organotypic hippocampal slice prepared from mice (Fig 4). The lateral  
163 and axial drift corrections successfully tracked most spines and dendrites for a long time regardless of  
164 morphological changes. However, the spine set to be stimulated sometimes moves relative to the  
165 dendrite. Since glutamate uncaging had to be precisely targeted to the surface of the spine, we added a  
166 secondary drift correction method which would relocate the uncaging target to the surface of the spine  
167 immediately prior to uncaging. This allowed automated glutamate uncaging on multiple spines at  
168 consistent locations at the spine surface. We found that glutamate uncaging induced a rapid increase in

volume within few minutes (transient phase) followed by long lasting enlargement (sustained phase), consistent with previous studies [3, 10, 41]. During the whole imaging session, the user did not need to be at the microscope, demonstrating the capability of automated tracking and stimulating software.

**Fig 4. Plasticity in dendritic spines induced using automated focus, drift correction, and glutamate uncaging.** (Top) CA1 dendrite pre- and post- uncaging. Arrow indicates photoactivation ROI. Scale = 1 $\mu$ m. Middle: Average volume change in spines following glutamate uncaging at t=0. Uncaging lasts 60s. Bottom: Quantification of transient (1-3 min) and sustained (26-30 min) change in spine volume. \*\*\*\* = p<0.0001, \* = p<0.05. n=24 Stimulated spines, 7 neurons.

## Discussion

We have designed an easily implementable module for Scanimage to allow for multi-position scanning and photoactivation of dendritic spines to study postsynaptic plasticity. Furthermore, we described an implementation of an ETL in the excitation path which minimizes the signal loss and distortion. The ETL served both to increase imaging speed and remove sample drift caused by rapid stage or objective movements when changing focus. Our optical implementation of the ETL as a remote focusing element is combined with a straightforward user interface which is able to align and control the ETL current, and as a result, the axial focus. Furthermore, our software interface allows users to tilt the imaging plane in 3D by rapidly modulating the axial focus position in phase with the Y-scanning galvanometer. We expect this feature to be particularly useful in neuroscience, where long, straight neuronal projections can be scanned along their own axis, resulting in a significant increase in scanning efficiency. We found that an ETL-based system is relatively low price and easily implemented in any two-photon microscope. While the focusing speed of an ETL (15 ms) is sufficient for multi-position imaging, tilted-plane imaging needs to be performed fairly slowly, at around 1Hz, to allow the ETL sufficient refocusing time along the imaging plane.



It should be noted that there are faster (but more expensive and potentially more complicated) focusing devices which could be used with our software. For example, spatial light modulators (SLMs) can create 3D holograms within 2-4 ms, and have adaptive optics capabilities to potentially decrease distortion and aberration [42-44]. A focusing device using a secondary objective and a galvanic mirror [45] provides even faster focus movement (~ 1 ms). Perhaps the most well-established remote focusing element is the acoustic optic deflector (AOD), which can provide high-performance volume imaging in tissue [46, 47].

As for controlling software, we implemented a highly capable and customizable focus and drift correction system in order to broaden biological applications. Previously, dozens of autofocus algorithms have been made available through primary literature and open source code [20]. However, these algorithms were not extensively implemented. Since imaging conditions may be drastically different for many users, we designed a tool capable of narrowing down the optimal algorithm based on accuracy and speed (Fig 3B). This allowed us to optimize our autofocusing algorithm to spine imaging experiments.

Finally, in order to allow the software to optimize experiments for biological events occurring at multiple time scales, we introduced a modular timeline scheduling feature which allows users to designate custom timeframes for imaging and photo-stimulation. This feature was especially important for studying sLTP, which has two distinct phases at different time scales (Fig. 4). During transient phase (first ~5 min following stimulation), it is crucial to acquire images with higher frequency (typically ~10 – 60 s per image) since the volume change is rapid. However, during the steady state (~10 – 60 min), spine volume is stable and fast acquisition is unnecessary and rather damaging to the sample. The typical sampling time for the steady state is ~2 – 20 min. We demonstrated that this implementation allows us to measure the time course of sLTP in several spines (so far up to ~5 spines) with high efficiency.

## 217 Conclusion

218 We successfully designed and implemented an automated system capable of reliably measuring sLTP  
 219 in multiple dendritic spines. The implementation of an ETL in the excitation path, combined with  
 220 galvanic mirror scanning, allowed us to quickly switch between imaging positions with minimum  
 221 perturbation to the sample. The customizable autofocus and drift correction system allows our software  
 222 to track and stimulate individual dendritic spines over extended imaging sessions. By dramatically  
 223 increasing the throughput of spine imaging and stimulation experiments, our system will accelerate  
 224 studies to understand molecular basis of spine structural plasticity. In addition, the flexible  
 225 implementation of software would allow researchers to use it for many imaging/photostimulation  
 226 experiments.

227

## 228 Methods

229 **ETL Implementation:** An EL-10-30 ETL (Optotune) was implemented in the excitation  
 230 pathway (Fig 1). The light path was designed in OpticStudio (Zemax) and optimized during setup so the  
 231 ETL is conjugated to the back aperture of the objective. Lens L1 shapes the beam to fill the ETL. L2  
 232 and L3 are used to conjugate the ETL to the back aperture of the objective. A typical scan lens and  
 233 tube lens setup passes the beam to the objective. The ETL is controlled by a current range of 0-300mA  
 234 as indicated in the manual.

235 **Software Design:** All programming was done in MATLAB to be compatible with Scanimage  
 236 3.8, available online for free (<http://scanimage.vidriotechnologies.com>). Autofocus and drift correction  
 237 functions were implemented based on published code [29, 48]. Abbreviations for focus measure  
 238 operators are listed in Table 1. Maximum Brightness (BRGT) assigns focus values based on the

maximum pixel intensity within the image. Maximum Brightness Gradient (MGRD) assigns focus values based on the maximum gradient magnitude value of the image. Drift correction in XY is calculated using a built-in MATLAB 2D cross-correlation algorithm [48].

**Evaluation of plasticity:** Mouse pups were euthanized by deep anesthesia by isofluorane followed by decapitation. Organotypic hippocampal slice cultures were prepared as described previously [49] from p4-p6 mice and were cultured for 10-12 days before transfection. A biolistic particle delivery system (Helios® Gene Gun System, Bio-Rad) was used to introduce fluorescent GFP labels to obtain sparse transfection of neurons. Two to six days after transfection, neurons in sparsely GFP-labeled CA1 hippocampal regions were chosen for imaging. Individual spines in the striatum radiatum on secondary apical dendrites were chosen for observation. MNI-caged L-glutamate (4-methoxy-7-nitroindolyl-caged L-glutamate, Tocris) was uncaged with a train of 820-nm laser pulses (3.5–4 mW under the objective, 30 times at 1 Hz) near a spine of interest. Pulse duration was varied 4-8ms based on depth of the spine in tissue, allowing for reliable uncaging without excess light exposure. Experiments were performed at room temperature in ACSF solution containing (in mM): 127 NaCl, 2.5 KCl, 25 NaHCO<sub>3</sub>, 1.25 NaH<sub>2</sub>PO<sub>4</sub>, 4 CaCl<sub>2</sub>, 25 glucose, 0.001 tetrodotoxin (Tocris) and 4 MNI-caged L-glutamate, bubbled with 95% O<sub>2</sub> and 5% CO<sub>2</sub>. All animal procedures were approved by the Max Planck Florida Institute for Neuroscience Animal Care and Use Committee, in accordance with guidelines by the US National Institutes of Health.

**Quantification and statistics:** Spine volume was quantified using custom software written in MATLAB; all Z slices were summed together and oval and polygonal ROIs were drawn to select spines and dendrites, respectively. Volumes for each object were standardized to their average pre-uncaging values. Statistical significance was obtained using unpaired t-tests comparing the stimulated spine and adjacent spine averages to the dendrite as a control.

# References:

1. Bailey CH, Kandel ER, Harris KM. Structural Components of Synaptic Plasticity and Memory Consolidation. Cold Spring Harb Perspect Biol. 2015;7(7):a021758. doi: 10.1101/cshperspect.a021758. PubMed PMID: 26134321.
2. Fu M, Yu X, Lu J, Zuo Y. Repetitive motor learning induces coordinated formation of clustered dendritic spines in vivo. Nature. 2012;483(7387):92-5. doi: 10.1038/nature10844. PubMed PMID: 22343892; PubMed Central PMCID: PMC3292711.
3. Matsuzaki M, Honkura N, Ellis-Davies GC, Kasai H. Structural basis of long-term potentiation in single dendritic spines. Nature. 2004;429(6993):761-6. doi: 10.1038/nature02617. PubMed PMID: 15190253; PubMed Central PMCID: PMC4158816.
4. Kim IH, Wang H, Soderling SH, Yasuda R. Loss of Cdc42 leads to defects in synaptic plasticity and remote memory recall. Elife. 2014;3:e02839-e. doi: 10.7554/eLife.02839. PubMed PMID: 25006034; PubMed Central PMCID: PMC4115656.
5. Hayashi-Takagi A, Yagishita S, Nakamura M, Shirai F, Wu YI, Loshbaugh AL, et al. Labelling and optical erasure of synaptic memory traces in the motor cortex. Nature. 2015;525(7569):333-8. doi: 10.1038/nature15257. PubMed PMID: 26352471; PubMed Central PMCID: PMC4634641.
6. Wilbrecht L, Holtmaat A, Wright N, Fox K, Svoboda K. Structural plasticity underlies experience-dependent functional plasticity of cortical circuits. J Neurosci. 2010;30(14):4927-32. doi: 10.1523/JNEUROSCI.6403-09.2010. PubMed PMID: 20371813; PubMed Central PMCID: PMC2910869.
7. Colgan LA, Yasuda R. Plasticity of dendritic spines: subcompartmentalization of signaling. Annu Rev Physiol. 2014;76:365-85. doi: 10.1146/annurev-physiol-021113-170400. PubMed PMID: 24215443; PubMed Central PMCID: PMC4142713.

- 285 8. Lee SJ, Escobedo-Lozoya Y, Szatmari EM, Yasuda R. Activation of CaMKII in single dendritic  
286 spines during long-term potentiation. *Nature*. 2009;458(7236):299-304. doi: 10.1038/nature07842.  
287 PubMed PMID: 19295602; PubMed Central PMCID: PMCPMC2719773.
- 288 9. Lisman J, Yasuda R, Raghavachari S. Mechanisms of CaMKII action in long-term potentiation.  
289 *Nat Rev Neurosci*. 2012;13(3):169-82. doi: 10.1038/nrn3192. PubMed PMID: 22334212; PubMed  
290 Central PMCID: PMCPMC4050655.
- 291 10. Murakoshi H, Wang H, Yasuda R. Local, persistent activation of Rho GTPases during plasticity  
292 of single dendritic spines. *Nature*. 2011;472(7341):100-4. doi: 10.1038/nature09823. PubMed PMID:  
293 21423166; PubMed Central PMCID: PMCPMC3105377.
- 294 11. Rex CS, Chen LY, Sharma A, Liu J, Babayan AH, Gall CM, et al. Different Rho GTPase-  
295 dependent signaling pathways initiate sequential steps in the consolidation of long-term potentiation. *J*  
296 *Cell Biol*. 2009;186(1):85-97. doi: 10.1083/jcb.200901084. PubMed PMID: 19596849; PubMed Central  
297 PMCID: PMCPMC2712993.
- 298 12. Bayes A, van de Lagemaat LN, Collins MO, Croning MD, Whittle IR, Choudhary JS, et al.  
299 Characterization of the proteome, diseases and evolution of the human postsynaptic density. *Nat*  
300 *Neurosci*. 2011;14(1):19-21. doi: 10.1038/nn.2719. PubMed PMID: 21170055; PubMed Central PMCID:  
301 PMCPMC3040565.
- 302 13. Fernandez E, Collins MO, Uren RT, Kopanitsa MV, Komiyama NH, Croning MD, et al. Targeted  
303 tandem affinity purification of PSD-95 recovers core postsynaptic complexes and schizophrenia  
304 susceptibility proteins. *Mol Syst Biol*. 2009;5(269):269. doi: 10.1038/msb.2009.27. PubMed PMID:  
305 19455133; PubMed Central PMCID: PMCPMC2694677.
- 306 14. Collins MO, Husi H, Yu L, Brandon JM, Anderson CN, Blackstock WP, et al. Molecular  
307 characterization and comparison of the components and multiprotein complexes in the postsynaptic

308 proteome. J Neurochem. 2006;97 Suppl 1(m):16-23. doi: 10.1111/j.1471-4159.2005.03507.x. PubMed  
309 PMID: 16635246.

310 15. Redondo R, Bueno G, Valdiviezo JC, Nava R, Cristobal G, Deniz O, et al. Autofocus evaluation  
311 for brightfield microscopy pathology. J Biomed Opt. 2012;17(3):036008. doi:  
312 10.1117/1.JBO.17.3.036008. PubMed PMID: 22502566.

313 16. Zhang ZC, Xia SR. [An autofocus algorithm based on principal component analysis]. Zhongguo  
314 Yi Liao Qi Xie Za Zhi. 2008;32(6):391-3, 7. PubMed PMID: 19253566.

315 17. Bravo-Zanoguera ME, Laris CA, Nguyen LK, Oliva M, Price JH. Dynamic autofocus for  
316 continuous-scanning time-delay-and-integration image acquisition in automated microscopy. J Biomed  
317 Opt. 2007;12(3):034011. doi: 10.1117/1.2743078. PubMed PMID: 17614719.

318 18. Shen F, Hodgson L, Hahn K. Digital autofocus methods for automated microscopy. Methods  
319 Enzymol. 2006;414:620-32. doi: 10.1016/S0076-6879(06)14032-X. PubMed PMID: 17110214.

320 19. Marks DL, Oldenburg AL, Reynolds JJ, Boppart SA. Autofocus algorithm for dispersion  
321 correction in optical coherence tomography. Appl Opt. 2003;42(16):3038-46. PubMed PMID: 12790455.

322 20. Geusebroek JM, Cornelissen F, Smeulders AW, Geerts H. Robust autofocusing in microscopy.  
323 Cytometry. 2000;39(1):1-9. PubMed PMID: 10655557.

324 21. Santos A, Ortiz de Solorzano C, Vaquero JJ, Pena JM, Malpica N, del Pozo F. Evaluation of  
325 autofocus functions in molecular cytogenetic analysis. J Microsc. 1997;188(Pt 3):264-72. PubMed  
326 PMID: 9450330.

327 22. Firestone L, Cook K, Culp K, Talsania N, Preston K, Jr. Comparison of autofocus methods for  
328 automated microscopy. Cytometry. 1991;12(3):195-206. Epub 01/01. doi: 10.1002/cyto.990120302.  
329 PubMed PMID: 2036914.

- 330 23. Price JH, Gough DA. Comparison of phase-contrast and fluorescence digital autofocus for  
331 scanning microscopy. *Cytometry*. 1994;16(4):283-97. doi: 10.1002/cyto.990160402. PubMed PMID:  
332 7988291.
- 333 24. Fairley CR, Thompson TV, Lee KK. Method and apparatus for automatic focusing of a confocal  
334 laser microscope. Google Patents; 1997.
- 335 25. Jabbour JM, Malik BH, Olsovsky C, Cuenca R, Cheng S, Jo JA, et al. Optical axial scanning in  
336 confocal microscopy using an electrically tunable lens. *Biomed Opt Express*. 2014;5(2):645-52. doi:  
337 10.1364/BOE.5.000645. PubMed PMID: 24575357; PubMed Central PMCID: PMC3920893.
- 338 26. Chen JL, Pfaffli OA, Voigt FF, Margolis DJ, Helmchen F. Online correction of licking-induced  
339 brain motion during two-photon imaging with a tunable lens. *J Physiol*. 2013;591(19):4689-98. doi:  
340 10.1113/jphysiol.2013.259804. PubMed PMID: 23940380; PubMed Central PMCID:  
341 PMC3800448.
- 342 27. Grewe BF, Voigt FF, van 't Hoff M, Helmchen F. Fast two-layer two-photon imaging of neuronal  
343 cell populations using an electrically tunable lens. *Biomed Opt Express*. 2011;2(7):2035-46. doi:  
344 10.1364/BOE.2.002035. PubMed PMID: 21750778; PubMed Central PMCID: PMC3130587.
- 345 28. Pologruto TA, Sabatini BL, Svoboda K. ScanImage: flexible software for operating laser  
346 scanning microscopes. *Biomed Eng Online*. 2003;2(1):13. doi: 10.1186/1475-925X-2-13. PubMed  
347 PMID: 12801419; PubMed Central PMCID: PMC3130587.
- 348 29. Pertuz S, Puig D, Garcia MA. Analysis of focus measure operators for shape-from-focus.  
349 *Pattern Recognition*. 2013;46(5):1415-32. doi: 10.1016/j.patcog.2012.11.011.
- 350 30. Shirvaikar M, editor An optimal measure for camera focus and exposure. *Proceedings of the*  
351 *Thirty-Sixth Southeastern Symposium on System Theory (SSST04)*; 2004.

352 31. Harsh Nanda RC, editor Practical calibrations for a real-time digital omnidirectional camera. In  
353 Technical Sketches, Computer Vision and Pattern Recognition; 2001.

354 32. Helmlí FS, Scherer S, editors. Adaptive shape from focus with an error estimation in light  
355 microscopy. Image and Signal Processing and Analysis, 2001 ISPA 2001 Proceedings of the 2nd  
356 International Symposium on; 2001: IEEE.

357 33. Lee S-Y, Yoo J-T, Kumar Y, Kim S-W. Reduced Energy-Ratio Measure for Robust Autofocusing  
358 in Digital Camera. IEEE Signal Processing Letters. 2009;16(2):133-6. doi: 10.1109/lsp.2008.2008938.

359 34. Krotkov E, Martin J-P, editors. Range from focus. Robotics and Automation Proceedings 1986  
360 IEEE International Conference on; 1986: IEEE.

361 35. Pech-Pacheco JL, Cristóbal G, Chamorro-Martínez J, Fernández-Valdivia J, editors. Diatom  
362 autofocus in brightfield microscopy: a comparative study. Pattern Recognition, 2000 Proceedings  
363 15th International Conference on; 2000: IEEE.

364 36. Nikzad MSTSCA. Focusing Techniques. Journal of Optical Engineering. 1993:2824-36.

365 37. Eskicioglu AM, Fisher PS. Image quality measures and their performance. IEEE Transactions  
366 on communications. 1995;43(12):2959-65.

367 38. Nayar SK, Nakagawa Y, editors. Shape from focus: an effective approach for rough surfaces.  
368 Robotics and Automation, 1990 Proceedings, 1990 IEEE International Conference on; 1990: IEEE.

369 39. Thelen A, Frey S, Hirsch S, Hering P. Improvements in shape-from-focus for holographic  
370 reconstructions with regard to focus operators, neighborhood-size, and height value interpolation. IEEE  
371 Trans Image Process. 2009;18(1):151-7. Epub 12/20. doi: 10.1109/TIP.2008.2007049. PubMed PMID:  
372 19095526.



- 373 40. Windsor RM, Univeresity of W, Abdul AM, Univeresity of W, Wu QMJ, Univeresity of W, et al.,  
374 editors. 3D Shape from Focus and Depth Map Computation Using Steerable Filters. ICIAR; 2016:  
375 Springer Berlin Heidelberg.
- 376 41. Murakoshi H, Lee SJ, Yasuda R. Highly sensitive and quantitative FRET-FLIM imaging in single  
377 dendritic spines using improved non-radiative YFP. *Brain Cell Biol.* 2008;36(1-4):31-42. doi:  
378 10.1007/s11068-008-9024-9. PubMed PMID: 18512154; PubMed Central PMCID: PMCPMC2673728.
- 379 42. Yang W, Miller JE, Carrillo-Reid L, Pnevmatikakis E, Paninski L, Yuste R, et al. Simultaneous  
380 Multi-plane Imaging of Neural Circuits. *Neuron.* 2016;89(2):269-84. doi: 10.1016/j.neuron.2015.12.012.  
381 PubMed PMID: 26774159; PubMed Central PMCID: PMCPMC4724224.
- 382 43. Lutz C, Otis TS, DeSars V, Charpak S, DiGregorio DA, Emiliani V. Holographic photolysis of  
383 caged neurotransmitters. *Nat Methods.* 2008;5(9):821-7. doi: 10.1038/nmeth.1241. PubMed PMID:  
384 19160517; PubMed Central PMCID: PMCPMC2711023.
- 385 44. Nikolenko V, Watson BO, Araya R, Woodruff A, Peterka DS, Yuste R. SLM Microscopy:  
386 Scanless Two-Photon Imaging and Photostimulation with Spatial Light Modulators. *Front Neural*  
387 *Circuits.* 2008;2(December):5. doi: 10.3389/neuro.04.005.2008. PubMed PMID: 19129923; PubMed  
388 Central PMCID: PMCPMC2614319.
- 389 45. Botcherby EJ, Smith CW, Kohl MM, Debarre D, Booth MJ, Juskaitis R, et al. Aberration-free  
390 three-dimensional multiphoton imaging of neuronal activity at kHz rates. *Proc Natl Acad Sci U S A.*  
391 2012;109(8):2919-24. doi: 10.1073/pnas.1111662109. PubMed PMID: 22315405; PubMed Central  
392 PMCID: PMCPMC3286923.
- 393 46. Duemani Reddy G, Kelleher K, Fink R, Saggau P. Three-dimensional random access  
394 multiphoton microscopy for functional imaging of neuronal activity. *Nat Neurosci.* 2008;11(6):713-20.  
395 doi: 10.1038/nn.2116. PubMed PMID: 18432198; PubMed Central PMCID: PMCPMC2747788.

- 396 47. Kirkby PA, Srinivas NKMN, Silver RA. Europe PMC Funders Group Europe PMC Funders  
397 Author Manuscripts A compact acousto-optic lens for 2D and 3D femtosecond based 2-photon  
398 microscopy. 2010;18(13):13721-45.
- 399 48. Sugar JD, Cummings AW, Jacobs BW, Robinson DB. A Free Matlab Script for Spatial Drift  
400 Correction. Microscopy Today. 2014;22(05):40-7. doi: 10.1017/s1551929514000790.
- 401 49. Stoppini L, Buchs PA, Muller D. A simple method for organotypic cultures of nervous tissue. J  
402 Neurosci Methods. 1991;37(2):173-82. PubMed PMID: 1715499.

**A**

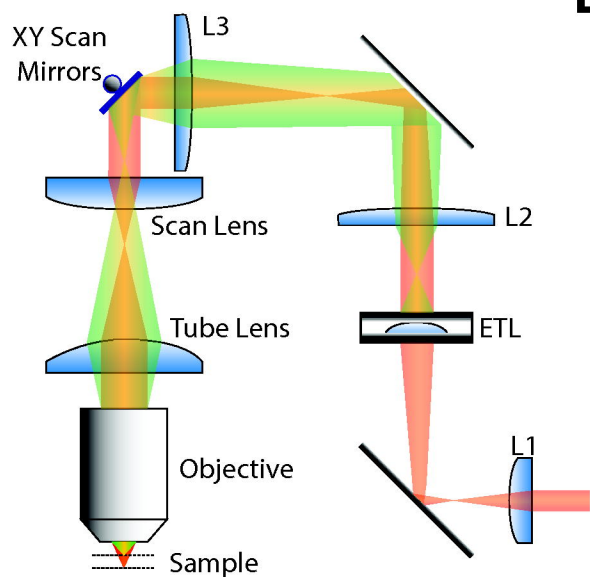

**B**

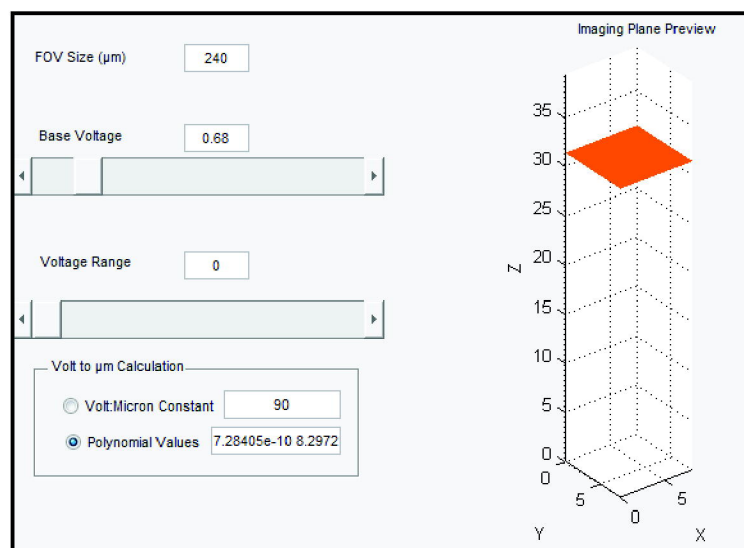

**C**

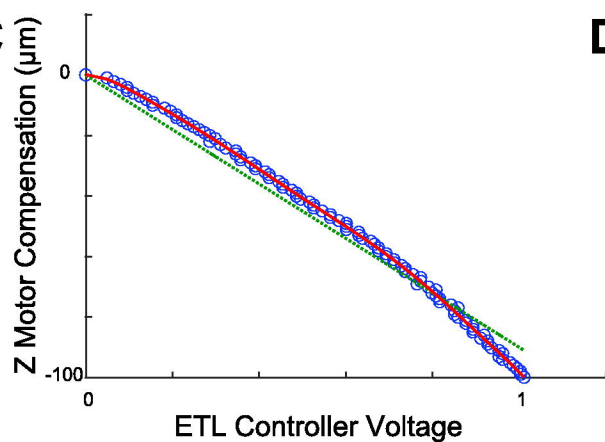

**D**

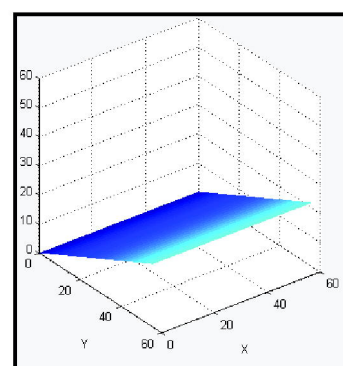

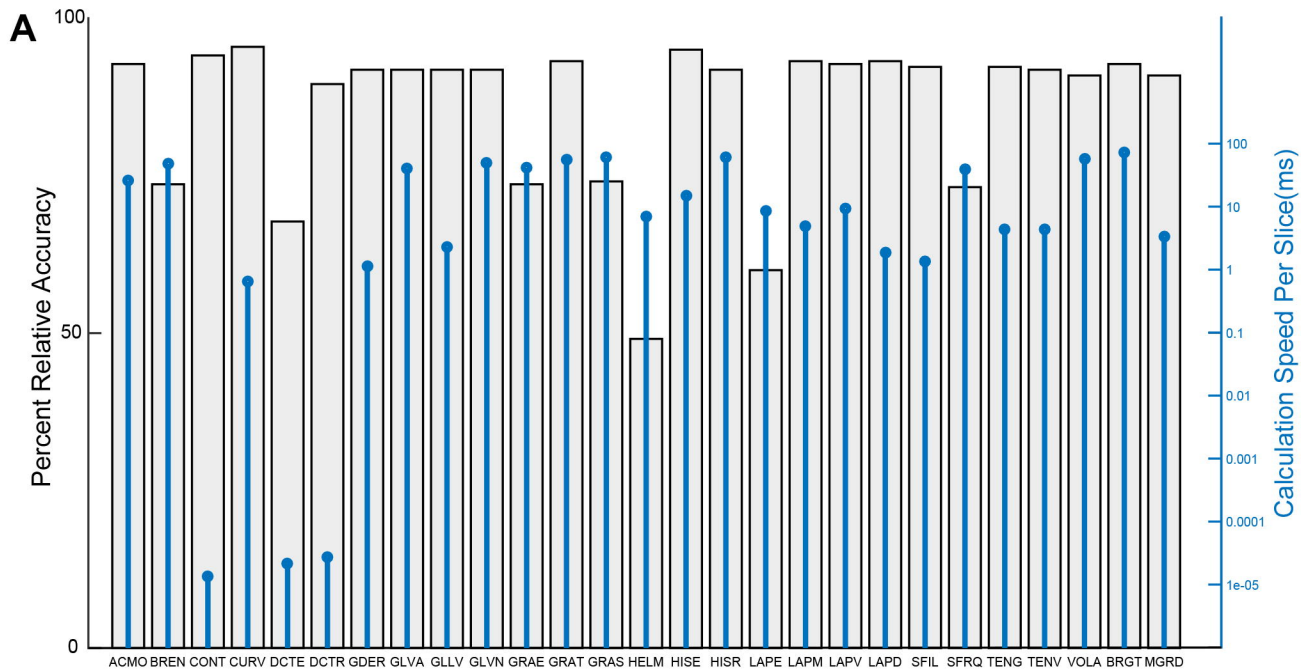

### Autofocus Algorithm

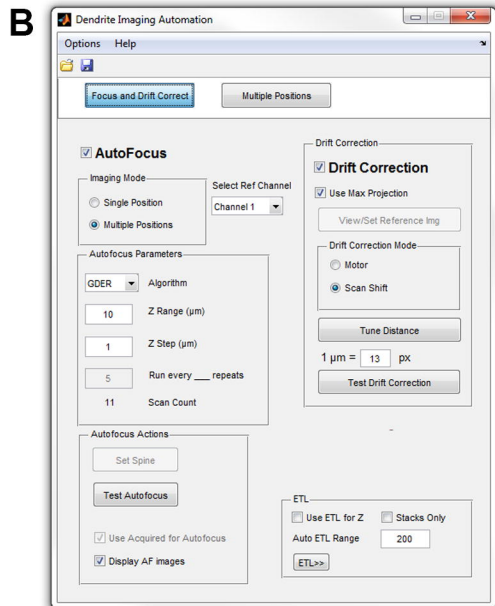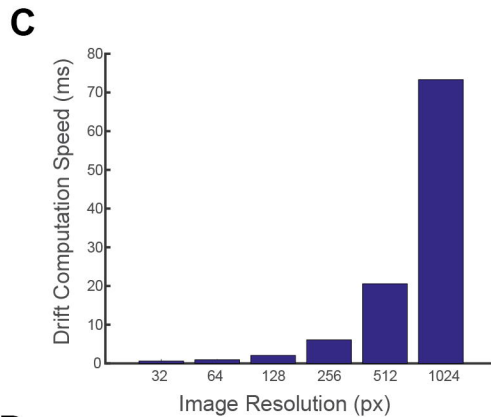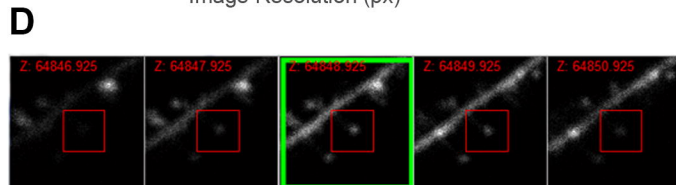

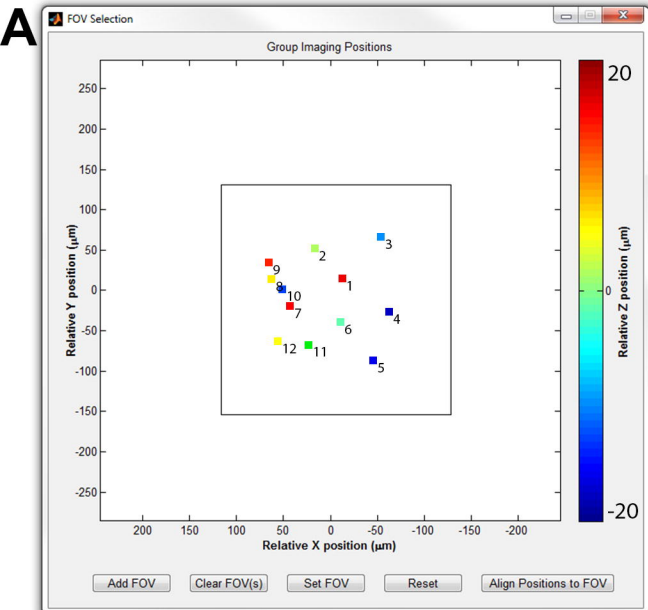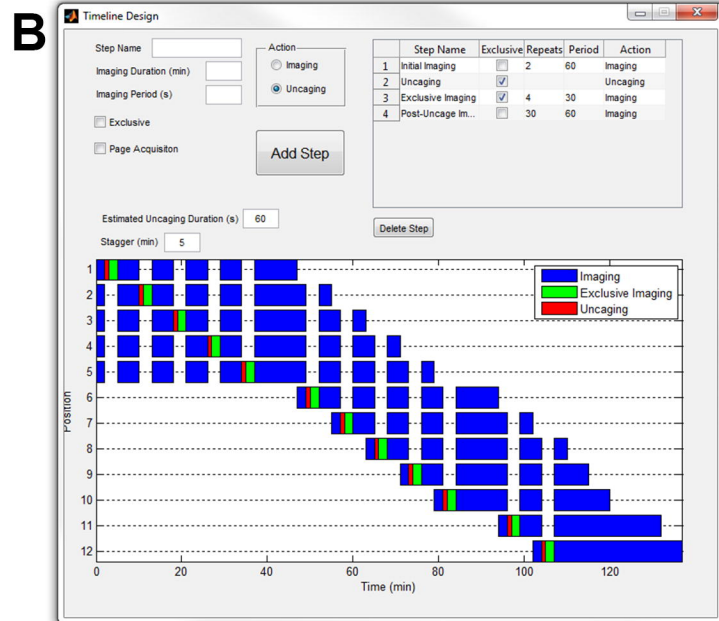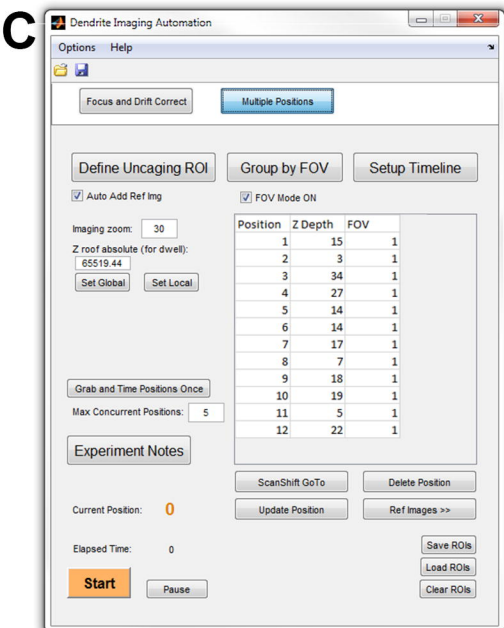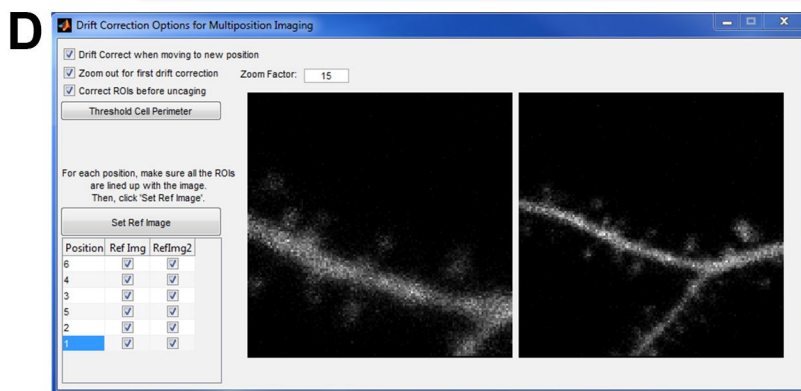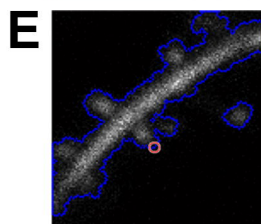

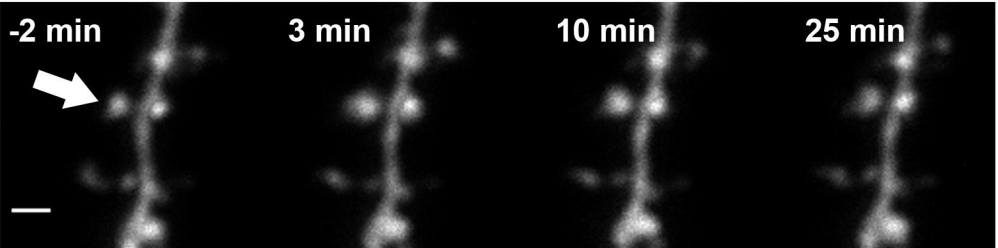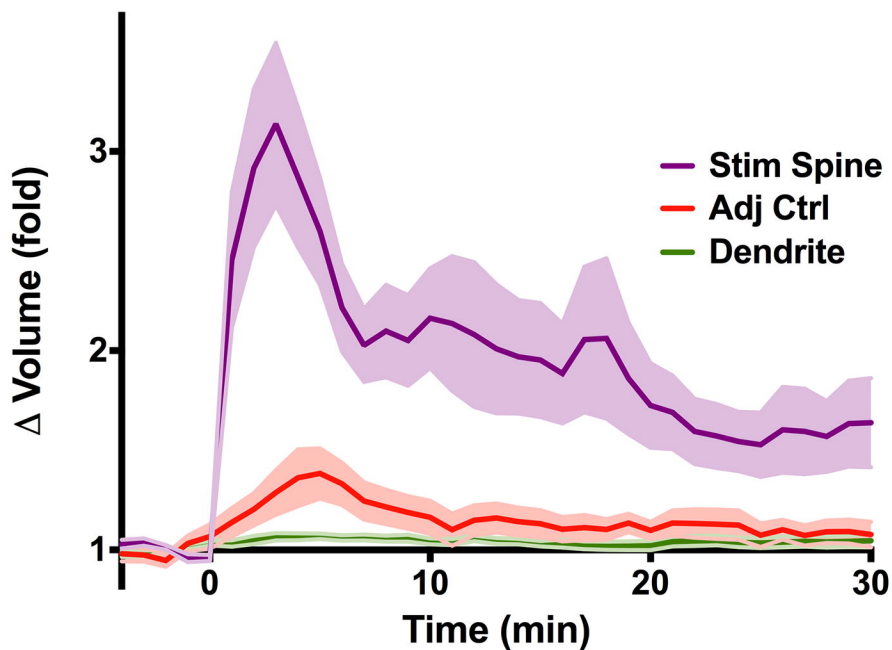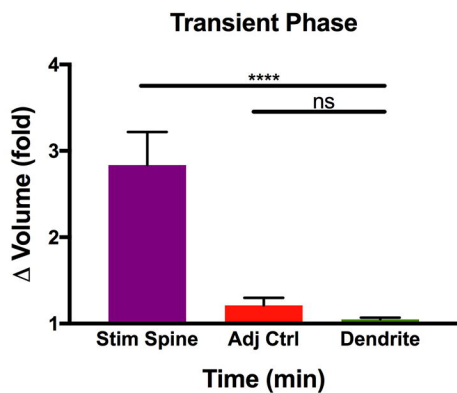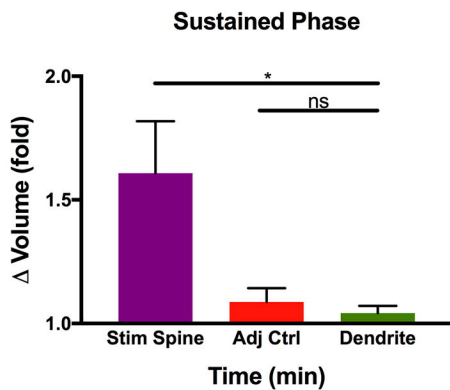

Source: https://www.biorxiv.org/content/10.1101/083006v1.full.pdf
